# Supplementary material for: Bending behavior of CNT fibers and their scaling laws
Source: Royal Society of Chemistry journal article supplement (doi:10.1039/c8sm01129j), 2018-01-01
Supplement: c8sm01129j1.pdf [file c8sm01129j1.pdf]

## Electronic Supplementary Information for *Soft Matter* Transcript: Bending Behavior of CNT Fibers and their Scaling Laws

Mohammed Adnan,<sup>\*a</sup> Robert A Pinnick,<sup>\*a</sup> Zhao Tang<sup>a</sup>, Lauren W Taylor<sup>a</sup>, Sushma Sri Pamulapati<sup>a</sup>, Gianni Royer Carfagni<sup>b</sup>, and Matteo Pasquali<sup>a</sup>

<sup>a</sup> Rice University, 6100 Main St. MS-369, Houston, TX, USA.

<sup>b</sup> University of Parma, Parco Area delle Scienze 181/A, I-43100, Parma, Italy.

Table 1: CNT fiber diameter measurements in  $\mu\text{m}$

| CNT Length<br>$2.21 \pm 0.24 \mu\text{m}$  | CNT Length<br>$4.17 \pm 0.17 \mu\text{m}$  | CNT Length<br>$6.28 \pm 0.14 \mu\text{m}$  | CNT Length<br>$6.28 \pm 0.14 \mu\text{m}$  | CNT Length<br>$6.28 \pm 0.14 \mu\text{m}$  |
|--------------------------------------------|--------------------------------------------|--------------------------------------------|--------------------------------------------|--------------------------------------------|
| Spinneret<br>Diameter<br>$150 \mu\text{m}$ | Spinneret<br>Diameter<br>$150 \mu\text{m}$ | Spinneret<br>Diameter<br>$150 \mu\text{m}$ | Spinneret<br>Diameter<br>$125 \mu\text{m}$ | Spinneret<br>Diameter<br>$100 \mu\text{m}$ |
| 21.01                                      | 21.16                                      | 22.11                                      | 21.22                                      | 12.02                                      |
| 21.43                                      | 21.61                                      | 21.09                                      | 17.74                                      | 13.36                                      |
| 22.62                                      | 22.83                                      | 20.62                                      | 16.21                                      | 12.45                                      |
| 23.64                                      | 22.02                                      | 19.48                                      | 17.43                                      | 12.63                                      |
| 22.62                                      | 21.61                                      | 22.67                                      | 15.89                                      | 11.43                                      |
| 22.22                                      | 21.73                                      | 25.55                                      | 16.35                                      | 12.78                                      |
| 21.41                                      | 22.02                                      | 20.85                                      | 15.43                                      | 12.32                                      |
| 22.42                                      | 21.81                                      | 20.55                                      | 16.36                                      | 12.69                                      |
| 23.23                                      | 22.00                                      | 22.94                                      | 16.54                                      | 11.46                                      |
| 22.62                                      | 23.03                                      | 22.48                                      | 22.90                                      | 13.31                                      |
| 22.02                                      | 21.82                                      | 23.77                                      | 22.45                                      |                                            |
| 23.63                                      | 22.02                                      | 24.80                                      |                                            |                                            |
|                                            | 21.82                                      | 20.25                                      |                                            |                                            |
|                                            | 23.03                                      | 20.23                                      |                                            |                                            |
|                                            | 22.62                                      |                                            |                                            |                                            |

Table 2: CNT fiber linear density in  $\text{mg/m}$

| CNT Length<br>$2.21 \pm 0.24 \mu\text{m}$  | CNT Length<br>$4.17 \pm 0.17 \mu\text{m}$  | CNT Length<br>$6.28 \pm 0.14 \mu\text{m}$  | CNT Length<br>$6.28 \pm 0.14 \mu\text{m}$  | CNT Length<br>$6.28 \pm 0.14 \mu\text{m}$  |
|--------------------------------------------|--------------------------------------------|--------------------------------------------|--------------------------------------------|--------------------------------------------|
| Spinneret<br>Diameter<br>$150 \mu\text{m}$ | Spinneret<br>Diameter<br>$150 \mu\text{m}$ | Spinneret<br>Diameter<br>$150 \mu\text{m}$ | Spinneret<br>Diameter<br>$125 \mu\text{m}$ | Spinneret<br>Diameter<br>$100 \mu\text{m}$ |
| 0.556                                      | 0.515                                      | 0.486                                      | 0.461                                      | 0.623                                      |
| 0.565                                      | 0.506                                      | 0.471                                      | 0.480                                      | 0.553                                      |
| 0.569                                      | 0.526                                      | 0.482                                      | 0.465                                      | 0.581                                      |
|                                            |                                            |                                            | 0.468                                      | 0.609                                      |
|                                            |                                            |                                            |                                            | 0.595                                      |
|                                            |                                            |                                            |                                            | 0.581                                      |

Table 3: CNT fiber tensile modulus ( $E_M$ ) measurements in GPa

| CNT Length<br>$2.21 \pm 0.24 \mu\text{m}$  | CNT Length<br>$4.17 \pm 0.17 \mu\text{m}$  | CNT Length<br>$6.28 \pm 0.14 \mu\text{m}$  | CNT Length<br>$6.28 \pm 0.14 \mu\text{m}$  | CNT Length<br>$6.28 \pm 0.14 \mu\text{m}$  |
|--------------------------------------------|--------------------------------------------|--------------------------------------------|--------------------------------------------|--------------------------------------------|
| Spinneret<br>Diameter<br>$150 \mu\text{m}$ | Spinneret<br>Diameter<br>$150 \mu\text{m}$ | Spinneret<br>Diameter<br>$150 \mu\text{m}$ | Spinneret<br>Diameter<br>$125 \mu\text{m}$ | Spinneret<br>Diameter<br>$100 \mu\text{m}$ |
| 72.5                                       | 126.0                                      | 151.3                                      | 168.3                                      | 160.8                                      |
| 66.2                                       | 129.2                                      | 135.1                                      | 192.7                                      | 151.8                                      |
| 79.0                                       | 130.3                                      |                                            | 158.7                                      | 131.9                                      |
|                                            | 231.2                                      |                                            |                                            |                                            |
|                                            | 192.9                                      |                                            |                                            |                                            |

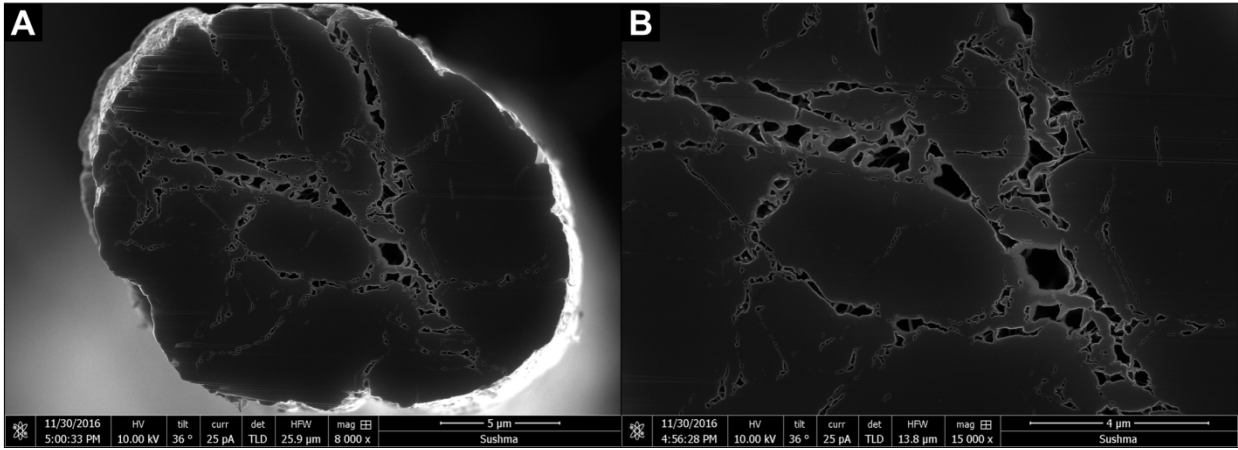

Figure 1: Cross-section HR-SEM of Meijo EC1.5 with CNT length  $4.17 \pm 0.17 \mu\text{m}$ . (A) Overall view and magnification with evidence of the voids in the fiber. (B) A close-up showing nanotubes fibrils bridging the voids.

Table 4: CNT fiber bending stiffness measurements ( $\kappa$ ) in  $\text{mN}\cdot\text{mm}^2$  for varying spinneret diameters and a fixed CNT length of  $6.28 \pm 0.14 \mu\text{m}$ .

| Spinneret Diameter<br>100 $\mu\text{m}$ |                                                  | Spinneret Diameter<br>125 $\mu\text{m}$ |                                                  | Spinneret Diameter<br>150 $\mu\text{m}$ |                                                  |
|-----------------------------------------|--------------------------------------------------|-----------------------------------------|--------------------------------------------------|-----------------------------------------|--------------------------------------------------|
| Cantilever Length<br>mm                 | Bending Stiffness<br>$\text{mN}\cdot\text{mm}^2$ | Cantilever Length<br>mm                 | Bending Stiffness<br>$\text{mN}\cdot\text{mm}^2$ | Cantilever Length<br>mm                 | Bending Stiffness<br>$\text{mN}\cdot\text{mm}^2$ |
| 71                                      | 0.36                                             | 128                                     | 0.57                                             | 141                                     | 1.23                                             |
| 72                                      | 0.39                                             | 121                                     | 0.58                                             | 137                                     | 1.06                                             |
| 71                                      | 0.36                                             | 120                                     | 0.54                                             | 128                                     | 1.15                                             |
| 67                                      | 0.35                                             | 112                                     | 0.75                                             | 125                                     | 1.21                                             |
| 65                                      | 0.31                                             | 109                                     | 0.91                                             | 119                                     | 1.22                                             |
| 55                                      | 0.23                                             | 96                                      | 0.93                                             | 117                                     | 1.25                                             |
|                                         |                                                  | 91                                      | 0.91                                             | 116                                     | 1.21                                             |
|                                         |                                                  | 86                                      | 0.96                                             | 111                                     | 1.25                                             |
|                                         |                                                  | 82                                      | 0.90                                             | 109                                     | 1.31                                             |
|                                         |                                                  | 78                                      | 0.81                                             | 103                                     | 1.15                                             |
|                                         |                                                  | 71                                      | 0.95                                             | 99                                      | 1.06                                             |
|                                         |                                                  | 61                                      | 0.75                                             | 96                                      | 1.14                                             |
|                                         |                                                  | 52                                      | 0.73                                             | 89                                      | 1.09                                             |
|                                         |                                                  |                                         |                                                  | 84                                      | 1.04                                             |
|                                         |                                                  |                                         |                                                  | 80                                      | 1.21                                             |
|                                         |                                                  |                                         |                                                  | 74                                      | 1.12                                             |
|                                         |                                                  |                                         |                                                  | 121                                     | 0.94                                             |
|                                         |                                                  |                                         |                                                  | 113                                     | 1.13                                             |
|                                         |                                                  |                                         |                                                  | 112                                     | 0.97                                             |
|                                         |                                                  |                                         |                                                  | 107                                     | 1.08                                             |
|                                         |                                                  |                                         |                                                  | 101                                     | 1.05                                             |
|                                         |                                                  |                                         |                                                  | 99                                      | 1.14                                             |
|                                         |                                                  |                                         |                                                  | 94                                      | 1.18                                             |
|                                         |                                                  |                                         |                                                  | 87                                      | 1.09                                             |
|                                         |                                                  |                                         |                                                  | 83                                      | 1.08                                             |
|                                         |                                                  |                                         |                                                  | 77                                      | 0.83                                             |
|                                         |                                                  |                                         |                                                  | 74                                      | 0.84                                             |
|                                         |                                                  |                                         |                                                  | 68                                      | 0.98                                             |
|                                         |                                                  |                                         |                                                  | 175                                     | 1.07                                             |
|                                         |                                                  |                                         |                                                  | 168                                     | 1.50                                             |
|                                         |                                                  |                                         |                                                  | 163                                     | 1.15                                             |
|                                         |                                                  |                                         |                                                  | 157                                     | 0.97                                             |
|                                         |                                                  |                                         |                                                  | 154                                     | 0.74                                             |
|                                         |                                                  |                                         |                                                  | 149                                     | 0.53                                             |
|                                         |                                                  |                                         |                                                  | 143                                     | 0.91                                             |
|                                         |                                                  |                                         |                                                  | 143                                     | 0.78                                             |
|                                         |                                                  |                                         |                                                  | 138                                     | 0.64                                             |
|                                         |                                                  |                                         |                                                  | 114                                     | 1.07                                             |
|                                         |                                                  |                                         |                                                  | 110                                     | 1.02                                             |
|                                         |                                                  |                                         |                                                  | 103                                     | 1.16                                             |
|                                         |                                                  |                                         |                                                  | 95                                      | 1.29                                             |
|                                         |                                                  |                                         |                                                  | 88                                      | 1.22                                             |
|                                         |                                                  |                                         |                                                  | 81                                      | 1.13                                             |
|                                         |                                                  |                                         |                                                  | 73                                      | 1.13                                             |
|                                         |                                                  |                                         |                                                  | 72                                      | 1.13                                             |
|                                         |                                                  |                                         |                                                  | 61                                      | 1.14                                             |

Table 5: CNT fiber bending stiffness measurements in  $\text{mN}\cdot\text{mm}^2$  for varying CNT lengths and a fixed spinneret diameter of  $150\ \mu\text{m}$ .

| CNT Length<br>$2.21 \pm 0.24\ \mu\text{m}$ |                                                  | CNT Length<br>$4.17 \pm 0.17\ \mu\text{m}$ |                                                  | CNT Length<br>$6.28 \pm 0.14\ \mu\text{m}$ |                                                  |
|--------------------------------------------|--------------------------------------------------|--------------------------------------------|--------------------------------------------------|--------------------------------------------|--------------------------------------------------|
| Cantilever Length<br>mm                    | Bending Stiffness<br>$\text{mN}\cdot\text{mm}^2$ | Cantilever Length<br>mm                    | Bending Stiffness<br>$\text{mN}\cdot\text{mm}^2$ | Cantilever Length<br>mm                    | Bending Stiffness<br>$\text{mN}\cdot\text{mm}^2$ |
| 103                                        | 0.18                                             | 151                                        | 0.70                                             | 141                                        | 1.23                                             |
| 100                                        | 0.26                                             | 147                                        | 0.86                                             | 137                                        | 1.06                                             |
| 94                                         | 0.26                                             | 141                                        | 0.68                                             | 128                                        | 1.15                                             |
| 89                                         | 0.28                                             | 137                                        | 0.63                                             | 125                                        | 1.21                                             |
| 82                                         | 0.20                                             | 133                                        | 0.58                                             | 119                                        | 1.22                                             |
| 75                                         | 0.23                                             | 129                                        | 0.58                                             | 117                                        | 1.25                                             |
| 71                                         | 0.25                                             | 127                                        | 0.64                                             | 116                                        | 1.21                                             |
| 115                                        | 0.06                                             | 121                                        | 0.53                                             | 111                                        | 1.25                                             |
| 111                                        | 0.05                                             | 118                                        | 0.64                                             | 109                                        | 1.31                                             |
| 103                                        | 0.23                                             | 113                                        | 0.65                                             | 103                                        | 1.15                                             |
| 96                                         | 0.27                                             | 110                                        | 0.75                                             | 99                                         | 1.06                                             |
| 91                                         | 0.33                                             | 108                                        | 0.86                                             | 96                                         | 1.14                                             |
|                                            |                                                  | 103                                        | 0.89                                             | 89                                         | 1.09                                             |
|                                            |                                                  | 100                                        | 0.91                                             | 84                                         | 1.04                                             |
|                                            |                                                  | 97                                         | 0.93                                             | 80                                         | 1.21                                             |
|                                            |                                                  | 89                                         | 0.91                                             | 74                                         | 1.12                                             |
|                                            |                                                  | 66                                         | 0.86                                             | 121                                        | 0.94                                             |
|                                            |                                                  |                                            |                                                  | 113                                        | 1.13                                             |
|                                            |                                                  |                                            |                                                  | 112                                        | 0.97                                             |
|                                            |                                                  |                                            |                                                  | 107                                        | 1.08                                             |
|                                            |                                                  |                                            |                                                  | 101                                        | 1.05                                             |
|                                            |                                                  |                                            |                                                  | 99                                         | 1.14                                             |
|                                            |                                                  |                                            |                                                  | 94                                         | 1.18                                             |
|                                            |                                                  |                                            |                                                  | 87                                         | 1.09                                             |
|                                            |                                                  |                                            |                                                  | 83                                         | 1.08                                             |
|                                            |                                                  |                                            |                                                  | 77                                         | 0.83                                             |
|                                            |                                                  |                                            |                                                  | 74                                         | 0.84                                             |
|                                            |                                                  |                                            |                                                  | 68                                         | 0.98                                             |
|                                            |                                                  |                                            |                                                  | 175                                        | 1.07                                             |
|                                            |                                                  |                                            |                                                  | 168                                        | 1.50                                             |
|                                            |                                                  |                                            |                                                  | 163                                        | 1.15                                             |
|                                            |                                                  |                                            |                                                  | 157                                        | 0.97                                             |
|                                            |                                                  |                                            |                                                  | 154                                        | 0.74                                             |
|                                            |                                                  |                                            |                                                  | 149                                        | 0.53                                             |
|                                            |                                                  |                                            |                                                  | 143                                        | 0.91                                             |
|                                            |                                                  |                                            |                                                  | 143                                        | 0.78                                             |
|                                            |                                                  |                                            |                                                  | 138                                        | 0.64                                             |
|                                            |                                                  |                                            |                                                  | 114                                        | 1.07                                             |
|                                            |                                                  |                                            |                                                  | 110                                        | 1.02                                             |
|                                            |                                                  |                                            |                                                  | 103                                        | 1.16                                             |
|                                            |                                                  |                                            |                                                  | 95                                         | 1.29                                             |
|                                            |                                                  |                                            |                                                  | 88                                         | 1.22                                             |
|                                            |                                                  |                                            |                                                  | 81                                         | 1.13                                             |
|                                            |                                                  |                                            |                                                  | 73                                         | 1.13                                             |
|                                            |                                                  |                                            |                                                  | 72                                         | 1.13                                             |
|                                            |                                                  |                                            |                                                  | 61                                         | 1.14                                             |
